# Supplementary material for: Large-area patterning of full-color quantum dot arrays beyond 1000 pixels per inch by selective electrophoretic deposition
Source: PubMed Central journal article supplement (PMC8322170; doi:10.1038/s41467-021-24931-x), 2021-07-29
Supplement: 41467_2021_24931_MOESM2_ESM.pdf [file 41467_2021_24931_MOESM2_ESM.pdf]

## **Description of Additional Supplementary Files**

File Name: Supplementary Movie 1

Description: The movie of SEPD of QDs in solution.
